# Supplementary material for: Multiple evolutionary routes of the single polar capsule in Thelohanellus species (Myxozoa; Myxobolidae)
Source: PubMed Central journal article supplement — Int J Parasitol Parasites Wildl. 2018 Nov 29;8:56–62. doi: 10.1016/j.ijppaw.2018.11.006 (PMC6319017; doi:10.1016/j.ijppaw.2018.11.006), 2018-11-29
Supplement: mmc1.pdf [file mmc1.pdf]

Topology 1

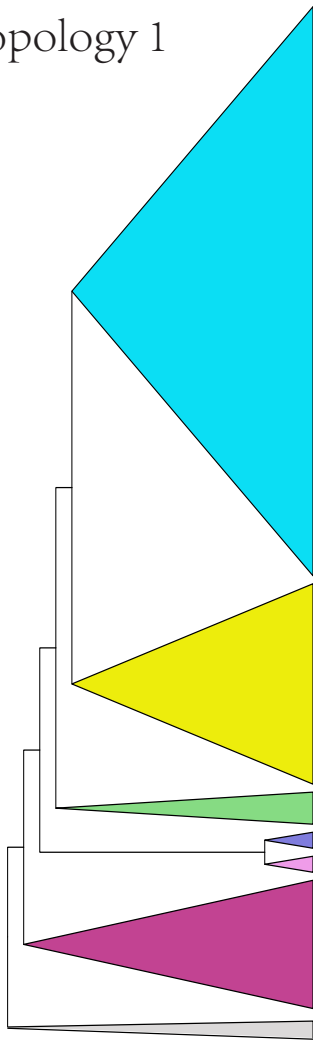

clade E

clade D

clade C  
clade B II  
clade B I

clade A

outgroup

Topology 2

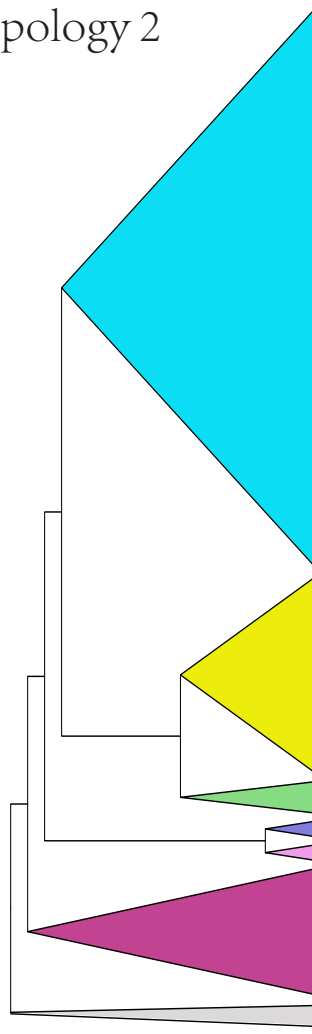

clade E

clade D

clade C  
clade B II  
clade B I

clade A

outgroup

Topology 3

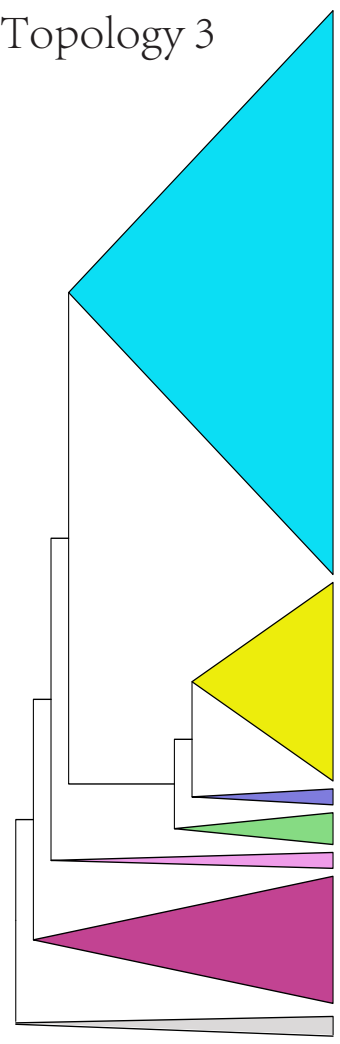

clade E

clade D

clade B II  
clade C  
clade B I

clade A

outgroup

Topology 4

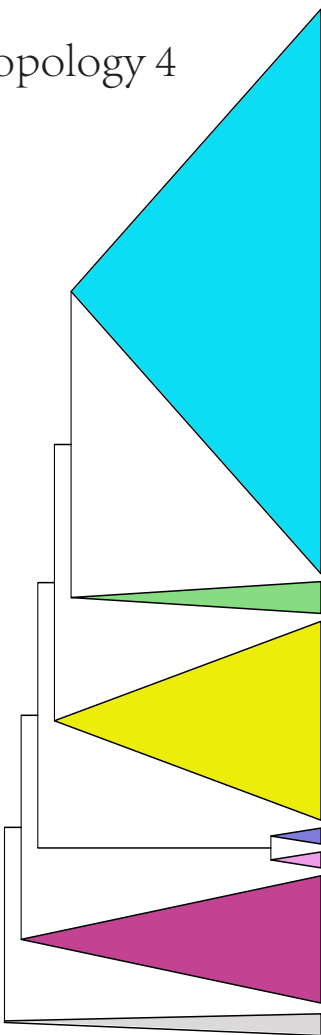

clade E

clade C

clade D

clade B II  
clade B I

clade A

outgroup

Topology 5

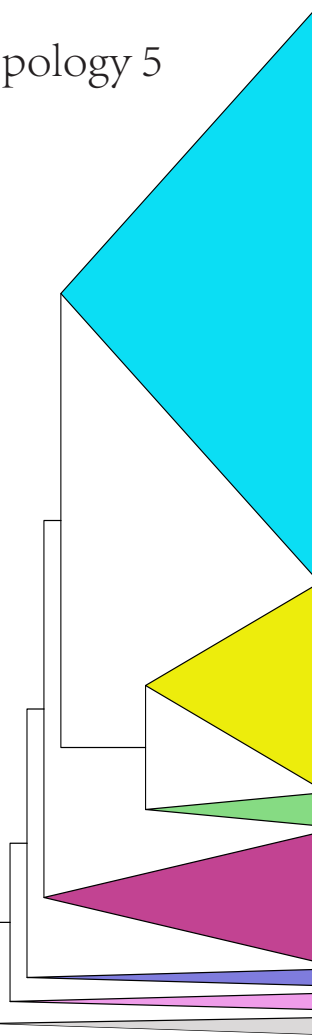

clade E

clade D

clade C

clade A

clade B II  
clade B I  
outgroup

Topology 6

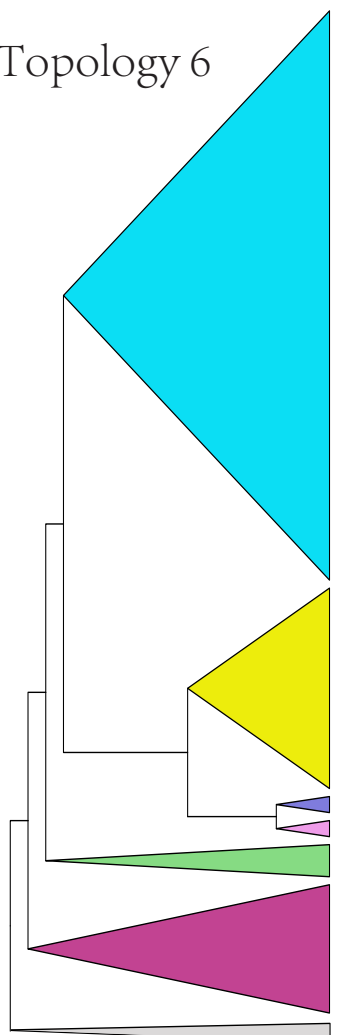

clade E

clade D

clade B II  
clade B I  
clade C

clade A

outgroup
