# Supplementary material for: Multiple evolutionary routes of the single polar capsule in Thelohanellus species (Myxozoa; Myxobolidae)
Source: PubMed Central journal article supplement — Int J Parasitol Parasites Wildl. 2018 Nov 29;8:56–62. doi: 10.1016/j.ijppaw.2018.11.006 (PMC6319017; doi:10.1016/j.ijppaw.2018.11.006), 2018-11-29

Ancestral reconstruction based on Topology 1

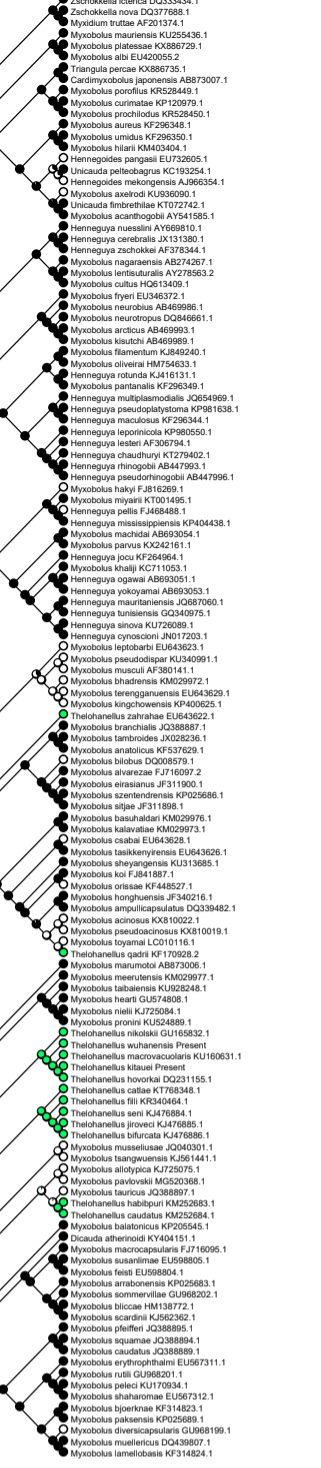

Ancestral reconstruction based on Topology 2

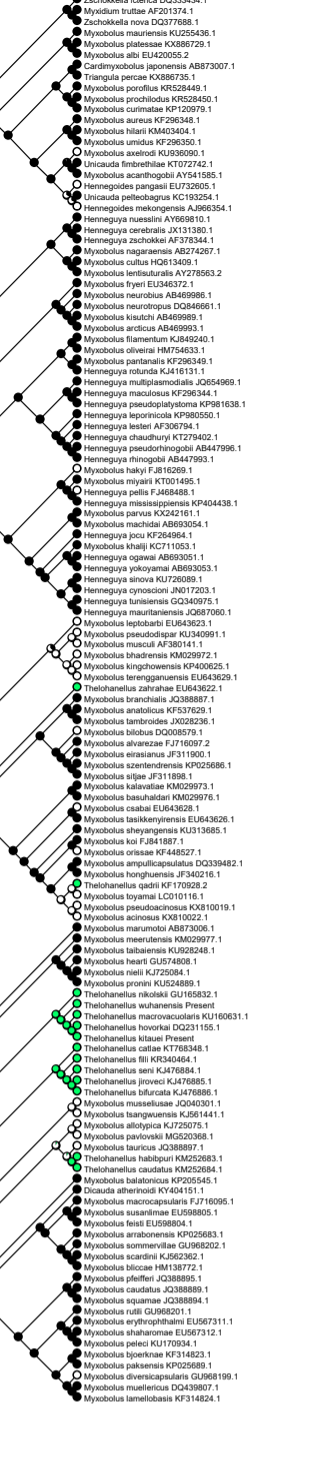

Ancestral reconstruction based on Topology 3

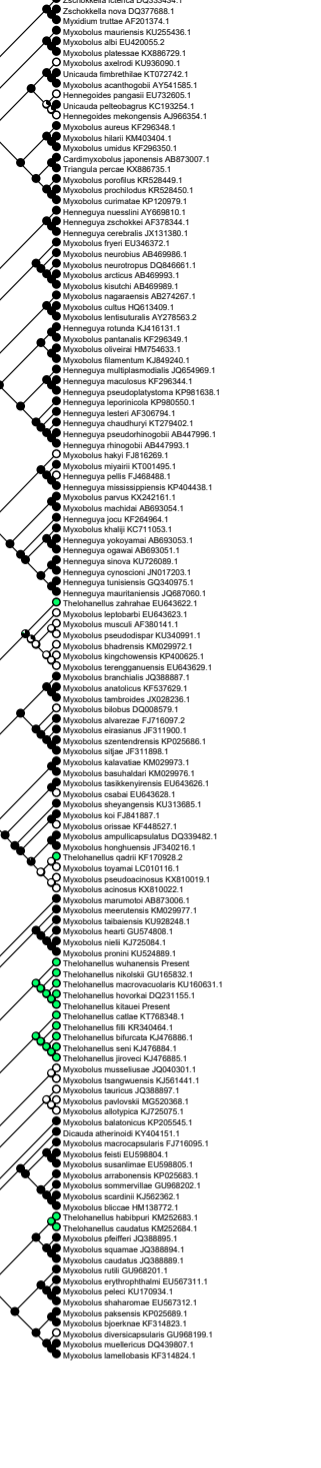

Ancestral reconstruction based on Topology 4

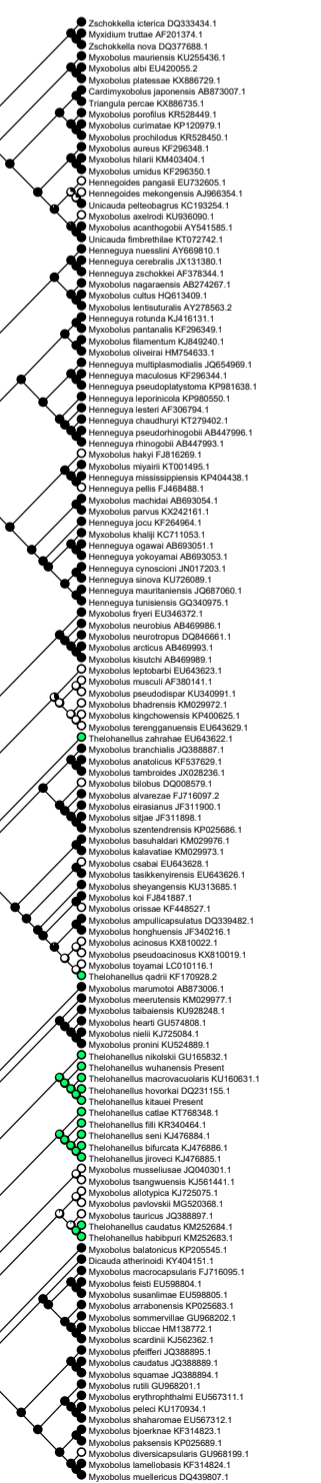

Ancestral reconstruction based on Topology 5

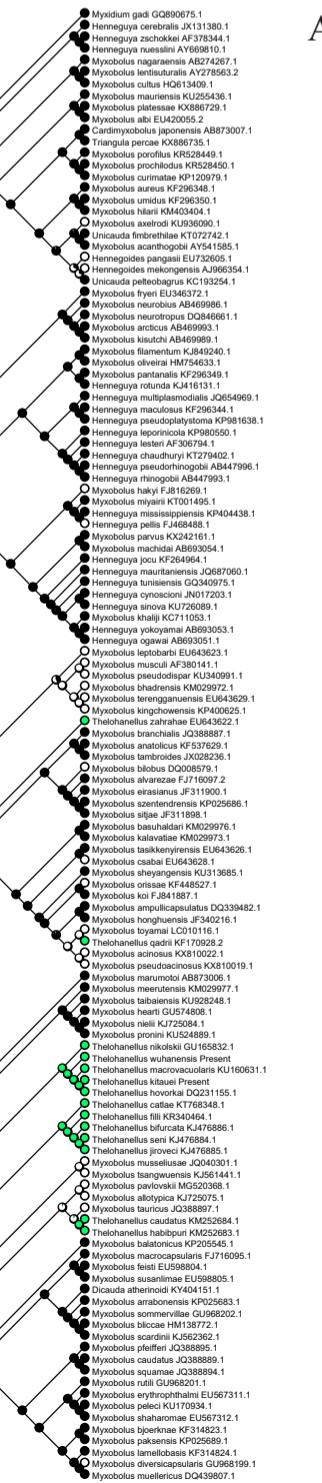

Ancestral reconstruction based on Topology 6

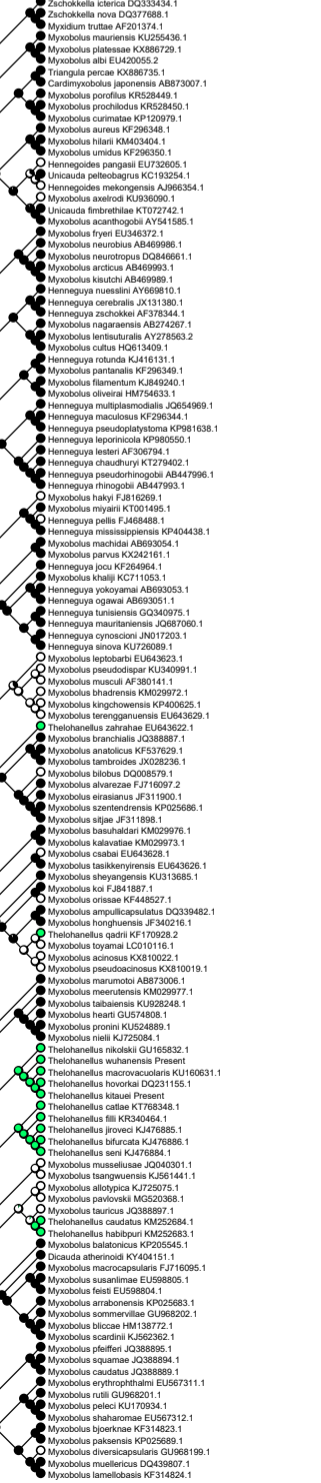

Supplement: mmc2.pdf [file mmc2.pdf]
